# Supplementary material for: INPP4B protects from metabolic syndrome and associated disorders
Source: PubMed Central journal article supplement (PMC7998001; doi:10.1038/s42003-021-01940-6), 2021-03-26
Supplement: 42003_2021_1940_MOESM3_ESM.pdf [file 42003_2021_1940_MOESM3_ESM.pdf]

## **Description of Additional Supplementary Files**

**File Name:** Supplementary Data 1

**Description:** Primers and probes used for gene expression analysis.

**File Name:** Supplementary Data 2

**Description:** Source data for Figures 1-7 and Supplementary Figures 1,3,4,5,7,8.
